# Supplementary material for: Kinematic analysis of the European Enhanced Exploration Exercise Device in unpowered mode
Source: Research Square preprint supplement (doi:10.21203/rs.3.rs-6987779/v1), 2025-09-08
Supplement: Supplementary file 1 [file 4be01527974c05aebadcfb27.docx]

# **Supplementary Figure**


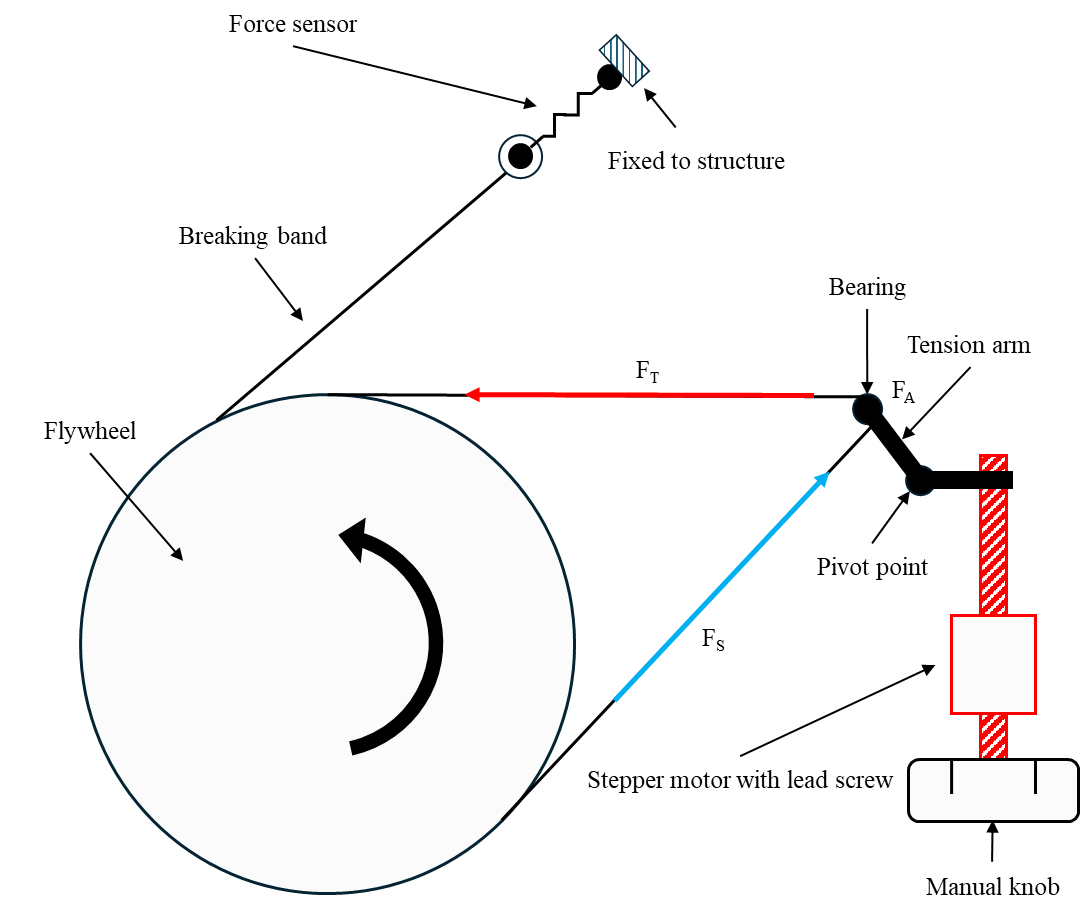


Supplementary figure 1: Visualization of European Enhanced Exploration Exercise Device (E4D) ergometer internal mechanics and forces. Forces acting on the braking band are tension forces for the tight (FT) and slack (FS) ends of the braking band, and an additional friction force (FA).
